# Supplementary figures and images for: Changes in Molar Tipping and Surrounding Alveolar Bone with Different Designs of Skeletal Maxillary Expanders
Source: MDPI journal article supplement (doi:10.3390/biomedicines11092380), 2023-08-25

Supplementary material: Figure S1. Example of measurements taken.

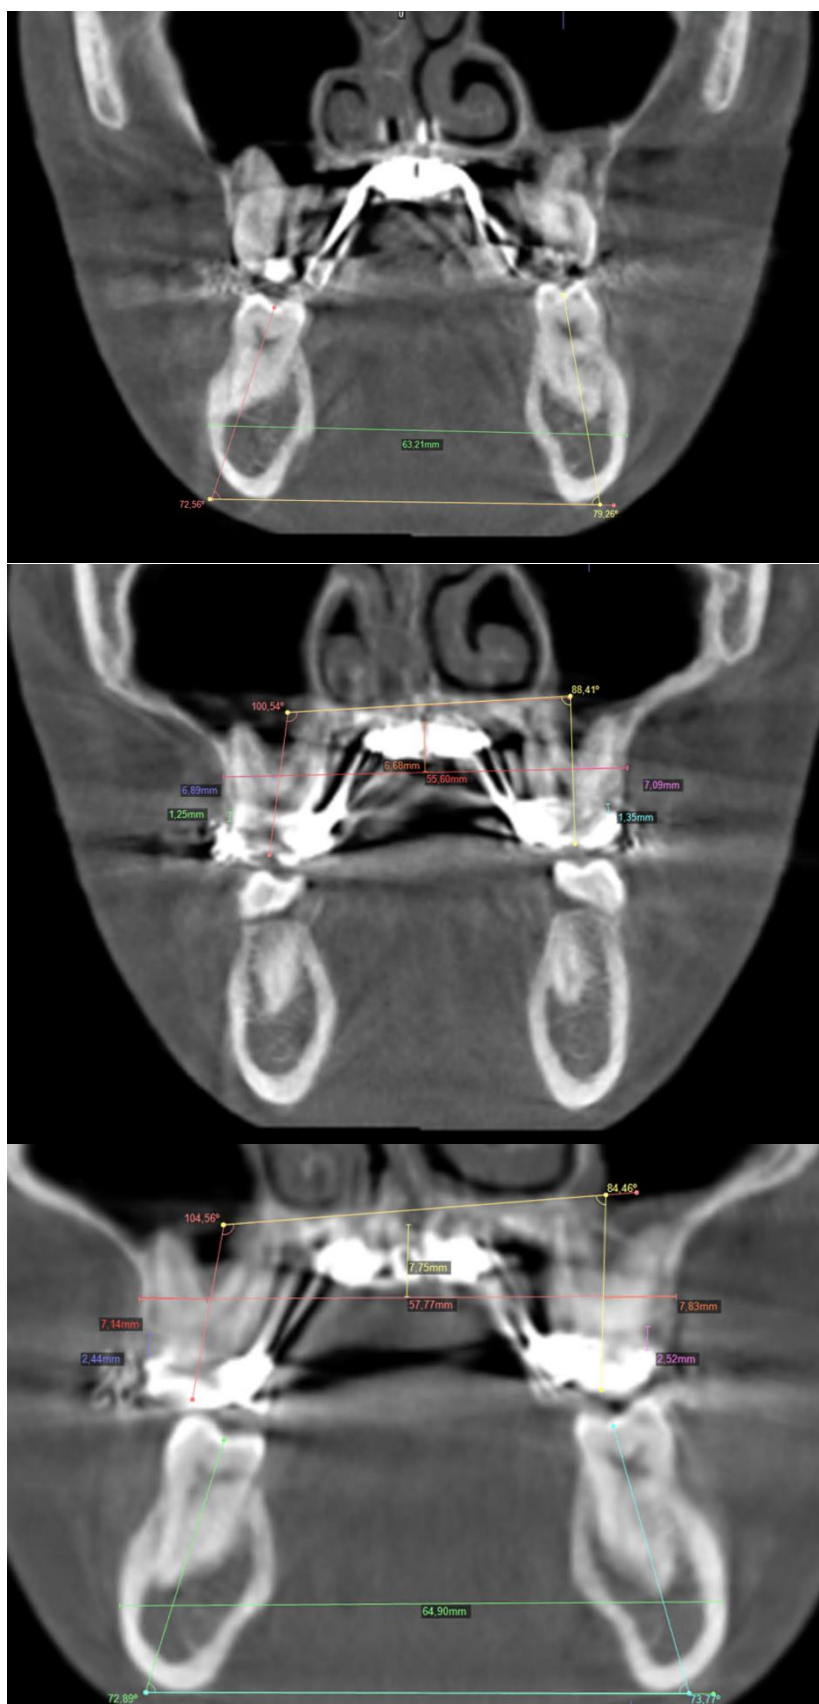

Supplement: s1 [file s1]
